# Supplementary material for: ABA Speeds Up the Progress of Color in Developing F. chiloensis Fruit through the Activation of PAL, CHS and ANS, Key Genes of the Phenylpropanoid/Flavonoid and Anthocyanin Pathways
Source: MDPI journal article supplement (doi:10.3390/ijms23073854), 2022-03-31
Supplement: s1 [file s1]

**Supplementary Table S1.** Nucleotide sequences of primer pairs employed in this study.

| Gene           |    | Sequence (5' → 3')          | Efficiency (%) | Source           |
|----------------|----|-----------------------------|----------------|------------------|
| <i>FcMYB1</i>  | Fw | GGTTGAGTTGAATCTC            | 97.3           | Synthesis / [11] |
|                | Rv | GCAACTTGAGGATCAGCC          |                |                  |
| <i>FcPAL2</i>  | Fw | GTGAACCTCTTCCGATATGCTA      | 96.0           | Synthesis        |
|                | Rv | CGATTAAAGCTAGGAATCCTCATCA   |                |                  |
| <i>FcPAL4</i>  | Fw | TGCAATTCCTATAGAGGGTCTTGA    | 100.7          | Synthesis        |
|                | Rv | GGCACAAATGTGTCTTTACCCA      |                |                  |
| <i>FcC4H</i>   | Fw | CCTCCCCCTCATAAAACCCACCA     | 110.0          | Synthesis        |
|                | Rv | CGATGATTGCGACTATAGCGA       |                |                  |
| <i>Fc4CL</i>   | Fw | ACTTGGTGAGGGATATGGGATG      | 108.0          | [11]             |
|                | Rv | GCACCAGTTTCAGGTCTACG        |                |                  |
| <i>FcCHS</i>   | Fw | CGTCTCTCGACACTTCTCCG        | 100.8          | Synthesis        |
|                | Rv | GGGTACGTGCTCTGGTCAAT        |                |                  |
| <i>FcCHI</i>   | Fw | TGGTAGGAGGTAGATGGCCGC       | 99.7           | Synthesis        |
|                | Rv | GGTGGTAGTTGGGACTTATCGT      |                |                  |
| <i>FcF3H</i>   | Fw | GGGAGGGGTTTGGTATAGCTT       | 96.1           | Synthesis        |
|                | Rv | GGTGTGGGGTGAAGGGGTGGTATAT   |                |                  |
| <i>FcF3'H</i>  | Fw | CAGAGAGTGGTGCGGAAAAG        | 97.9           | Synthesis        |
|                | Rv | CCTTCAACACCATATCGACTCA      |                |                  |
| <i>FcDFR1</i>  | Fw | TAACTAAGGCATGGGGTTGG        | 95.9           | Synthesis        |
|                | Rv | CCTGTGGTAACTCCAGCAGA        |                |                  |
| <i>FcANS</i>   | Fw | ACCCATAACTATAACTGTTTAAGGGCT | 97.9           | Synthesis        |
|                | Rv | TTGATCTTCGCAGCCAGTGT        |                |                  |
| <i>FcUFGT</i>  | Fw | ACCTAGGGTAGCAGCGTACA        | 94.7           | Synthesis        |
|                | Rv | GTCATGCTCTTGCTCGGCAAC       |                |                  |
| <i>FcFLS</i>   | Fw | TTATCTTTGGGGTTAGGGCTTGAA    | 100.0          | Synthesis        |
|                | Rv | GAGAATGGTGAGGGCGGACA        |                |                  |
| <i>FcLAR</i>   | Fw | GGTGATGGCACGGTTAAAGC        | 100.4          | [11]             |
|                | Rv | CTCCCACAGTGAAGCAAGTCC       |                |                  |
| <i>FcANR</i>   | Fw | AACTAGAAACCGGTGGTCTTTGT     | 90.0           | Synthesis        |
|                | Rv | GCTGAAGTTCTCAGCATGTTATGAT   |                |                  |
| <i>Fc18S</i>   | Fw | ATTTCGGTCCTATTCTGTTGGC      | 96.0           | [30]             |
|                | Rv | GCTTTCGCAGTTGTTCTGCTTTT     |                |                  |
| <i>FcGAPDH</i> | Fw | GATCTACCTTGCGCAAACCA        | 96.0           | [31]             |
|                | Rv | GAGGCGGATCATGTGAACTT        |                |                  |
